# Supplementary material for: Toward Early and Objective Hand Osteoarthritis Detection by Using EMG during Grasps
Source: MDPI journal article supplement (doi:10.3390/s23052413), 2023-02-22
Supplement: s1 [file s1]

# SUPPLEMENTARY MATERIAL

Néstor J. Jarque-Bou \*, Verónica Gracia-Ibáñez, Alba Roda-Sales, Vicente Bayarri-Porcar,  
Joaquín L. Sancho-Bru and Margarita Vergara  
February 17, 2023

This document provides the supplementary material to support the manuscript entitled “Toward early and objective hand osteoarthritis detection by using EMG during grasps” submitted to SENSORS

**Table S1.** Statistics (average (SD)) of all EMG characteristics for each spot, grasp and group.

| P2D |      |             | Spot          |               |               |                |                |                |                |
|-----|------|-------------|---------------|---------------|---------------|----------------|----------------|----------------|----------------|
|     |      | Group       | WF_UD         | WF_RD         | DF            | TM             | FE             | WE_UD          | WE_RD          |
|     | N/ZC | M           | 969.2(108.0)  | 784.9 (100.8) | 871.4 (109.1) | 759.2 (73.2)   | 848.7 (109.1)  | 900.6 (80.7)   | 930.4 (115.0)  |
|     |      | W           | 942.3(90.4)   | 745.6 (121.4) | 786.4 (63.8)  | 758.8 (106.2)  | 833.3 (99.5)   | 895.4 (81.2)   | 888.4 (87.1)   |
|     |      | HOA         | 891.9(137.4)  | 727.4 (120.7) | 776.9 (168.9) | 727.3 (158.3)  | 808.0 (118.0)  | 863.5 (113.0)  | 827.5 (127.9)  |
|     | EWL  | M           | 976.9(355.4)  | 906.5 (284.4) | 883.3 (139.3) | 1562.3 (381.5) | 1593.7 (421.0) | 1487.7 (385.8) | 1308.5 (208.2) |
|     |      | W           | 1176.5(280.3) | 682.8 (224.9) | 887.7 (154.2) | 1236.5 (461.7) | 1491.8 (421.4) | 1571.1 (295.2) | 1422.6 (334.0) |
|     |      | HOA         | 760.5(280.9)  | 691.7 (215.8) | 843.6 (256.7) | 909.0 (407.5)  | 1206.9 (420.3) | 1050.4 (421.1) | 978.0 (298.5)  |
|     | EMAV | M           | 0.33(0.11)    | 0.34 (0.10)   | 0.32 (0.07)   | 0.62 (0.16)    | 0.58 (0.13)    | 0.52 (0.12)    | 0.46 (0.08)    |
|     |      | W           | 0.41 (0.09)   | 0.28 (0.11)   | 0.33 (0.05)   | 0.48 (0.16)    | 0.55 (0.13)    | 0.55 (0.09)    | 0.50 (0.11)    |
|     |      | HOA         | 0.27 (0.10)   | 0.28 (0.08)   | 0.33 (0.12)   | 0.37 (0.16)    | 0.45 (0.14)    | 0.38 (0.14)    | 0.36 (0.10)    |
| MA  | M    | 0.21 (0.11) | 0.22 (0.10)   | 0.19 (0.07)   | 0.54 (0.21)   | 0.50 (0.17)    | 0.42 (0.14)    | 0.34 (0.09)    |                |
|     | W    | 0.28 (0.10) | 0.16 (0.10)   | 0.21 (0.05)   | 0.37 (0.19)   | 0.45 (0.17)    | 0.46 (0.11)    | 0.40 (0.13)    |                |
|     | HOA  | 0.15 (0.08) | 0.16 (0.07)   | 0.21 (0.12)   | 0.24 (0.15)   | 0.34 (0.15)    | 0.26 (0.14)    | 0.24 (0.09)    |                |

| LP |      |             | Spot          |               |               |                |                |                |                |
|----|------|-------------|---------------|---------------|---------------|----------------|----------------|----------------|----------------|
|    |      | Group       | WF_UD         | WF_RD         | DF            | TM             | FE             | WE_UD          | WE_RD          |
|    | NZN  | M           | 907.8 (69.0)  | 733.2 (88.8)  | 850.9 (89.5)  | 855.2 (111.4)  | 848.8 (88.4)   | 864.3 (73.5)   | 981.6 (94.3)   |
|    |      | W           | 941.0 (75.5)  | 751.8 (114.5) | 851.3 (116.0) | 792.5 (96.1)   | 799.2 (81.1)   | 870.8 (68.8)   | 917.0 (100.0)  |
|    |      | HOA         | 862.1 (151.3) | 727.7 (125.9) | 845.6 (206.2) | 708.6 (173.6)  | 765.8 (116.6)  | 850.5 (163.2)  | 815.0 (138.9)  |
|    | EWL  | M           | 937.7 (270.8) | 923.0 (288.8) | 902.5 (304.8) | 1450.5 (415.8) | 1532.9 (319.5) | 1181.4 (337.8) | 1723.0 (412.9) |
|    |      | W           | 1184 (523.7)  | 625.9 (236.0) | 901.8 (458.4) | 1067.1 (400.0) | 1302.5 (508.7) | 1317.5 (281.3) | 1775.8 (580.4) |
|    |      | HOA         | 643.8 (217.3) | 646.0 (172.9) | 749.3 (256.1) | 841.0 (280.4)  | 962.3 (303.2)  | 850.6 (331.7)  | 1113.6 (393.6) |
|    | EMAV | M           | 0.33 (0.09)   | 0.37 (0.11)   | 0.33 (0.12)   | 0.52 (0.14)    | 0.56 (0.11)    | 0.42 (0.11)    | 0.57 (0.12)    |
|    |      | W           | 0.40 (0.17)   | 0.25 (0.10)   | 0.33 (0.15)   | 0.40 (0.14)    | 0.49 (0.17)    | 0.47 (0.09)    | 0.61 (0.18)    |
|    |      | HOA         | 0.23 (0.07)   | 0.26 (0.07)   | 0.29 (0.14)   | 0.36 (0.14)    | 0.38 (0.12)    | 0.31 (0.11)    | 0.42 (0.15)    |
| MA | M    | 0.21 (0.09) | 0.25 (0.12)   | 0.22 (0.13)   | 0.42 (0.17)   | 0.46 (0.15)    | 0.30 (0.12)    | 0.48 (0.16)    |                |
|    | W    | 0.29 (0.21) | 0.14 (0.08)   | 0.22 (0.15)   | 0.28 (0.14)   | 0.39 (0.20)    | 0.36 (0.11)    | 0.55 (0.24)    |                |
|    | HOA  | 0.12 (0.06) | 0.14 (0.06)   | 0.17 (0.14)   | 0.21 (0.12)   | 0.24 (0.12)    | 0.18 (0.10)    | 0.30 (0.17)    |                |

| CYL |      |             | Spot          |                |                |                |                |                |                |
|-----|------|-------------|---------------|----------------|----------------|----------------|----------------|----------------|----------------|
|     |      | Group       | WF_UD         | WF_RD          | DF             | TM             | FE             | WE_UD          | WE_RD          |
|     | NZC  | M           | 747.7 (101.9) | 612.2 (86.2)   | 588.9 (122.4)  | 651.3 (122.6)  | 695.0 (89.8)   | 888.4 (74.0)   | 828.2 (129.9)  |
|     |      | W           | 836.7 (118.9) | 607.0 (63.8)   | 651.6 (147.3)  | 640.6 (116.5)  | 703.3 (95.8)   | 892.4 (90.7)   | 782.6 (91.9)   |
|     |      | HOA         | 722.6 (137.7) | 601.6 (136.4)  | 652.3 (147.6)  | 670.7 (182.5)  | 738.8 (127.5)  | 797.0 (166.1)  | 725.5 (139.8)  |
|     | EWL  | M           | 2120 (279.4)  | 1281.5 (193.4) | 1793.6 (210.7) | 1923.5 (306.4) | 1589.3 (393.8) | 1741.7 (375.2) | 2031.8 (302.8) |
|     |      | W           | 2084 (426.4)  | 928.0 (334.0)  | 1428.2 (330.7) | 1363.1 (453.7) | 1179.9 (257.7) | 1723.2 (220.4) | 1971.4 (337.4) |
|     |      | HOA         | 1169 (364.9)  | 967.0 (326.2)  | 1246.6 (338.6) | 923.7 (320.0)  | 1197.2 (377.9) | 1235.2 (383.7) | 1222.1 (385.6) |
|     | EMAV | M           | 0.84 (0.13)   | 0.57 (0.09)    | 0.82 (0.10)    | 0.84 (0.15)    | 0.65 (0.17)    | 0.63 (0.14)    | 0.74 (0.07)    |
|     |      | W           | 0.77 (0.15)   | 0.41 (0.14)    | 0.62 (0.15)    | 0.59 (0.18)    | 0.48 (0.10)    | 0.61 (0.08)    | 0.75 (0.13)    |
|     |      | HOA         | 0.49 (0.16)   | 0.45 (0.15)    | 0.56 (0.15)    | 0.40 (0.12)    | 0.48 (0.14)    | 0.48 (0.14)    | 0.50 (0.14)    |
| MA  | M    | 0.85 (0.20) | 0.47 (0.11)   | 0.82 (0.15)    | 0.85 (0.22)    | 0.58 (0.23)    | 0.55 (0.19)    | 0.71 (0.12)    |                |
|     | W    | 0.76 (0.21) | 0.29 (0.15)   | 0.54 (0.20)    | 0.50 (0.22)    | 0.37 (0.12)    | 0.53 (0.10)    | 0.73 (0.18)    |                |
|     | HOA  | 0.38 (0.18) | 0.33 (0.17)   | 0.46 (0.18)    | 0.27 (0.12)    | 0.37 (0.15)    | 0.37 (0.15)    | 0.39 (0.16)    |                |

| LUM |      |             | Spot          |               |               |                |                |                |                |
|-----|------|-------------|---------------|---------------|---------------|----------------|----------------|----------------|----------------|
|     |      | Group       | WF_UD         | WF_RD         | DF            | TM             | FE             | WE_UD          | WE_RD          |
|     | NZC  | M           | 931.9 (139.3) | 713.0 (76.5)  | 639.6 (77.5)  | 715.2 (85.2)   | 806.7 (92.0)   | 913.8 (70.5)   | 880.8 (95.1)   |
|     |      | W           | 927.3 (92.8)  | 670.7 (78.2)  | 700.0 (114.0) | 728.2 (116.5)  | 789.3 (54.2)   | 882.4 (84.3)   | 817.3 (82.3)   |
|     |      | HOA         | 787.7 (136.1) | 656.1 (136.5) | 652.8 (152.4) | 675.0 (124.9)  | 748.0 (98.0)   | 799.5 (115.6)  | 774.6 (71.4)   |
|     | EWL  | M           | 962.2 (305.5) | 890.6 (206.0) | 926.8 (147.6) | 1198.9 (320.8) | 1222.6 (275.1) | 1202.8 (349.1) | 1506.1 (393.6) |
|     |      | W           | 1138 (386.4)  | 670.2 (220.4) | 862.0 (322.5) | 892.6 (300.5)  | 1123.7 (350.6) | 1188.2 (242.9) | 1513.3 (361.7) |
|     |      | HOA         | 755.1 (235.0) | 779.8 (281.7) | 856.9 (232.4) | 878.7 (344.3)  | 1189.4 (432.5) | 957.9 (383.0)  | 1212.4 (353.1) |
|     | EMAV | M           | 0.33 (0.08)   | 0.36 (0.08)   | 0.41 (0.07)   | 0.48 (0.11)    | 0.46 (0.10)    | 0.42 (0.11)    | 0.53 (0.12)    |
|     |      | W           | 0.40 (0.13)   | 0.28 (0.10)   | 0.35 (0.13)   | 0.36 (0.11)    | 0.43 (0.12)    | 0.42 (0.08)    | 0.56 (0.11)    |
|     |      | HOA         | 0.29 (0.08)   | 0.34 (0.12)   | 0.38 (0.12)   | 0.37 (0.14)    | 0.47 (0.16)    | 0.36 (0.12)    | 0.47 (0.13)    |
| MA  | M    | 0.21 (0.08) | 0.23 (0.09)   | 0.28 (0.08)   | 0.37 (0.13)   | 0.34 (0.11)    | 0.30 (0.12)    | 0.43 (0.14)    |                |
|     | W    | 0.28 (0.13) | 0.16 (0.08)   | 0.24 (0.13)   | 0.23 (0.11)   | 0.31 (0.14)    | 0.30 (0.08)    | 0.46 (0.15)    |                |
|     | HOA  | 0.17 (0.07) | 0.22 (0.12)   | 0.25 (0.12)   | 0.24 (0.15)   | 0.35 (0.18)    | 0.24 (0.12)    | 0.35 (0.14)    |                |

| OBL |      |       | Spot          |                |                |                |                |                |                |
|-----|------|-------|---------------|----------------|----------------|----------------|----------------|----------------|----------------|
|     |      | Group | WF_UD         | WF_RD          | DF             | TM             | FE             | WE_UD          | WE_RD          |
|     | NZC  | M     | 803.7 (85.5)  | 640.9 (94.6)   | 630.0 (110.0)  | 628.9 (93.5)   | 738.3 (66.6)   | 914.9 (67.6)   | 861.2 (111.4)  |
|     |      | W     | 848.6 (101.1) | 652.1 (93.8)   | 704.3 (175.1)  | 681.4 (147.5)  | 723.2 (94.8)   | 872.8 (84.2)   | 841.0 (97.1)   |
|     |      | HOA   | 734.6 (128.4) | 621.2 (105.7)  | 677.9 (132.6)  | 687.4 (139.9)  | 765.3 (124.5)  | 775.8 (162.5)  | 768.4 (117.1)  |
|     | EWL  | M     | 1779 (214.1)  | 1133.3 (267.4) | 1601.9 (373.7) | 1517.9 (205.1) | 1472.9 (259.6) | 1651.8 (334.9) | 1808.9 (295.0) |
|     |      | W     | 1675 (599.3)  | 720.9 (252.7)  | 1077.3 (419.1) | 1052.3 (359.7) | 1088.1 (402.4) | 1499.1 (328.7) | 1684.6 (445.7) |
|     |      | HOA   | 1065 (349.3)  | 852.7 (272.6)  | 1119.0 (355.8) | 910.7 (279.4)  | 1193.8 (387.1) | 1187.8 (304.0) | 1231.8 (328.2) |
|     | EMAV | M     | 0.68 (0.07)   | 0.49 (0.09)    | 0.70 (0.12)    | 0.67 (0.10)    | 0.58 (0.11)    | 0.57 (0.11)    | 0.65 (0.07)    |
|     |      | W     | 0.61 (0.22)   | 0.31 (0.11)    | 0.45 (0.17)    | 0.45 (0.16)    | 0.43 (0.14)    | 0.53 (0.11)    | 0.62 (0.17)    |
|     |      | HOA   | 0.43 (0.15)   | 0.38 (0.13)    | 0.48 (0.16)    | 0.38 (0.11)    | 0.47 (0.14)    | 0.46 (0.11)    | 0.48 (0.13)    |
|     | MA   | M     | 0.61 (0.10)   | 0.37 (0.11)    | 0.65 (0.18)    | 0.60 (0.14)    | 0.49 (0.14)    | 0.48 (0.14)    | 0.58 (0.09)    |
|     |      | W     | 0.56 (0.28)   | 0.19 (0.09)    | 0.34 (0.18)    | 0.34 (0.16)    | 0.32 (0.15)    | 0.44 (0.14)    | 0.56 (0.22)    |
|     |      | HOA   | 0.32 (0.17)   | 0.26 (0.14)    | 0.37 (0.19)    | 0.25 (0.12)    | 0.35 (0.15)    | 0.35 (0.13)    | 0.37 (0.15)    |

| INTPP |      |       | Spot          |               |                |                |                |                |                |
|-------|------|-------|---------------|---------------|----------------|----------------|----------------|----------------|----------------|
|       |      | Group | WF_UD         | WF_RD         | DF             | TM             | FE             | WE_UD          | WE_RD          |
|       | NZC  | M     | 752.1 (134.1) | 643.4 (110.0) | 610.1 (110.1)  | 688.1 (107.6)  | 817.7 (84.6)   | 852.4 (88.0)   | 856.7 (118.0)  |
|       |      | W     | 844.8 (96.0)  | 634.8 (94.2)  | 678.4 (120.6)  | 664.5 (119.1)  | 769.2 (77.8)   | 873.5 (82.9)   | 827.4 (106.6)  |
|       |      | HOA   | 684.1 (115.9) | 587.4 (97.2)  | 636.1 (94.6)   | 686.3 (125.2)  | 752.8 (101.0)  | 744.2 (153.5)  | 755.9 (80.8)   |
|       | EWL  | M     | 1762 (334.2)  | 927.3 (203.6) | 1383.9 (443.4) | 1495.8 (237.4) | 1527.6 (269.3) | 1411.4 (288.6) | 1622.3 (231.1) |
|       |      | W     | 1743 (333.6)  | 671.0 (228.3) | 1148.7 (261.4) | 1040.1 (388.4) | 1076.8 (309.8) | 1377.4 (390.4) | 1683.7 (519.1) |
|       |      | HOA   | 1396 (424.0)  | 955.1 (350.0) | 1177.5 (319.5) | 964.3 (419.1)  | 1344.7 (420.1) | 1261.1 (386.5) | 1183.6 (308.5) |
|       | EMAV | M     | 0.70 (0.19)   | 0.40 (0.09)   | 0.61 (0.19)    | 0.63 (0.13)    | 0.57 (0.08)    | 0.52 (0.11)    | 0.59 (0.10)    |
|       |      | W     | 0.65 (0.15)   | 0.29 (0.09)   | 0.49 (0.14)    | 0.44 (0.14)    | 0.41 (0.10)    | 0.49 (0.12)    | 0.62 (0.18)    |
|       |      | HOA   | 0.58 (0.15)   | 0.44 (0.15)   | 0.51 (0.14)    | 0.40 (0.16)    | 0.53 (0.15)    | 0.51 (0.16)    | 0.46 (0.12)    |
|       | MA   | M     | 0.67 (0.27)   | 0.27 (0.10)   | 0.54 (0.26)    | 0.55 (0.18)    | 0.47 (0.11)    | 0.41 (0.13)    | 0.50 (0.14)    |
|       |      | W     | 0.60 (0.19)   | 0.17 (0.09)   | 0.38 (0.17)    | 0.32 (0.15)    | 0.29 (0.11)    | 0.39 (0.14)    | 0.57 (0.24)    |
|       |      | HOA   | 0.49 (0.18)   | 0.32 (0.17)   | 0.41 (0.16)    | 0.28 (0.18)    | 0.42 (0.18)    | 0.41 (0.18)    | 0.34 (0.14)    |

SPOTS: Wrist flexion and ulnar deviation (WF\_UD); wrist flexion and radial deviation (WF\_RD); digit flexion (DF); thumb extension and abduction/adduction (TM); finger extension (FE); wrist extension and ulnar deviation (WE\_UD); wrist extension and radial deviation (WE\_RD).

GRASPS: two-finger pad-to-pad pinch (P2D); cylindrical grasp (Cyl); lumbrical grasp (Lum); lateral pinch (LatP); oblique palmar grasp (Obl); intermediate power-precision grasp (IntPP).

GROUP: healthy men (M); healthy women (W); hand osteoarthritis subjects (HOA)
